# Supplementary material for: The Neuroprotective Properties of Hericium erinaceus in Glutamate-Damaged Differentiated PC12 Cells and an Alzheimer’s Disease Mouse Model
Source: Int J Mol Sci. 2016 Nov 1;17(11):1810. doi: 10.3390/ijms17111810 (PMC5133811; doi:10.3390/ijms17111810)
Supplement: Supplementary file 1 [file ijms-17-01810-s001.pdf]

# Supplementary Materials: The Neuroprotective Properties of *Hericium erinaceus* in Glutamate-Damaged Differentiated PC12 Cells and an Alzheimer's Disease Mouse Model

Junrong Zhang, Shengshu An, Wenji Hu, Meiyu Teng, Xue Wang, Yidi Qu, Yang Liu, Ye Yuan and Di Wang

## 2. Results

### *The Effects of HE on L-Glu-Induced Intracellular ROS Accumulation*

Three-hour HE preincubation followed by another 12 h coexposure to L-Glu strongly reduced high green fluorescence in DCFH-DA staining, suggesting its inhibition of ROS accumulation (Figure S1).

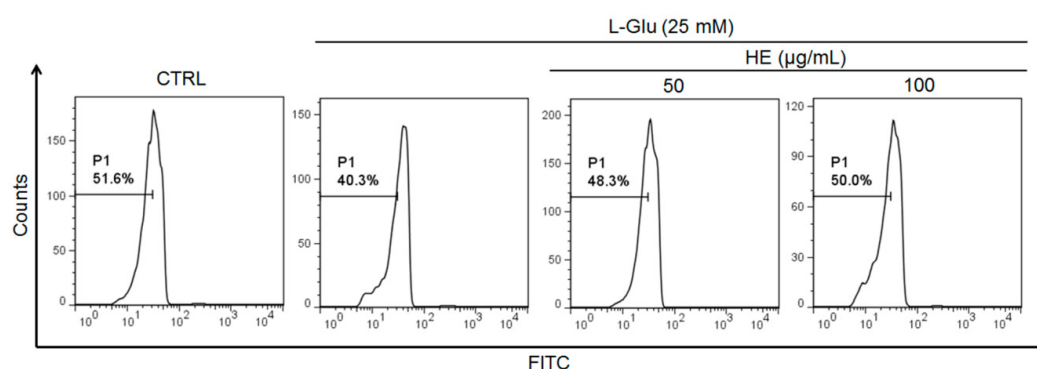

**Figure S1.** The overaccumulation of ROS caused by 12 h L-Glu incubation was significantly reduced by 3 h HE pretreatment, detected via DCFH-DA staining ( $n = 3$ ).

## 4. Methods and Materials

### *Assessment of ROS*

The intracellular ROS level was measured by 2',7'-Dichlorodihydrofluorescein diacetate (DCFH-DA, Sigma-Aldrich, St. Louis, Missouri, USA) staining. Cells were seeded into 6-well plates at  $2 \times 10^5$  cells per well. DPC12 cells were treated with HE (50 and 100 µg/mL) for 3 h, and then cocubated with 25 mM of L-Glu for another 12 h. After three washes with phosphate-buffered saline (PBS), the changes of intracellular ROS level were analyzed by flow cytometry (FC500, Beckman Coulter, Brea, CA, USA). The experiment was repeated three times.
